# Supplementary material for: Unique band structure enhanced visible light photocatalytic activity of phosphorus-doped BiOI hierarchical microspheres
Source: Royal Society of Chemistry journal article supplement (doi:10.1039/c7ra06261c), 2017-01-01
Supplement: c7ra06261c1.pdf [file c7ra06261c1.pdf]

*Supplementary materials*

**Unique band structure enhancing visible light photocatalytic activity of  
phosphorus-doped BiOI hierarchical microspheres**

Fen-Qiang Ma, Jing-Wen Yao, Yan-Feng Zhang\* and Yu Wei

College of chemistry and material science, Hebei Normal University, Shijiazhuang,

050024, P. R. China

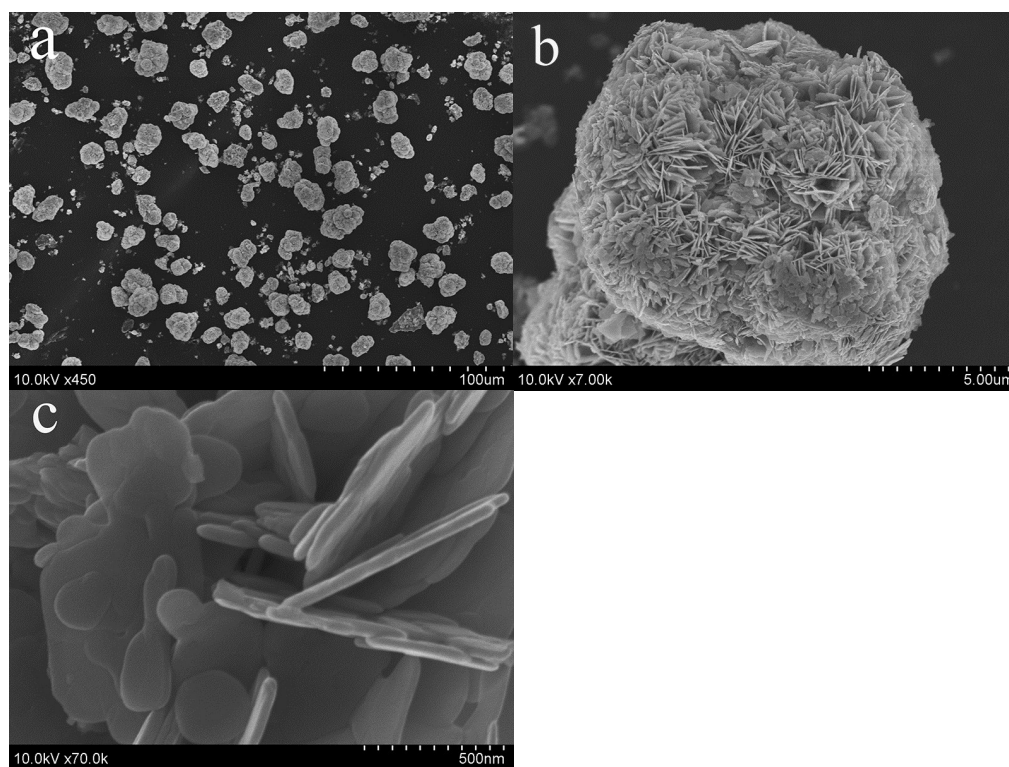

**Fig. S1** SEM images of pure BiOI.

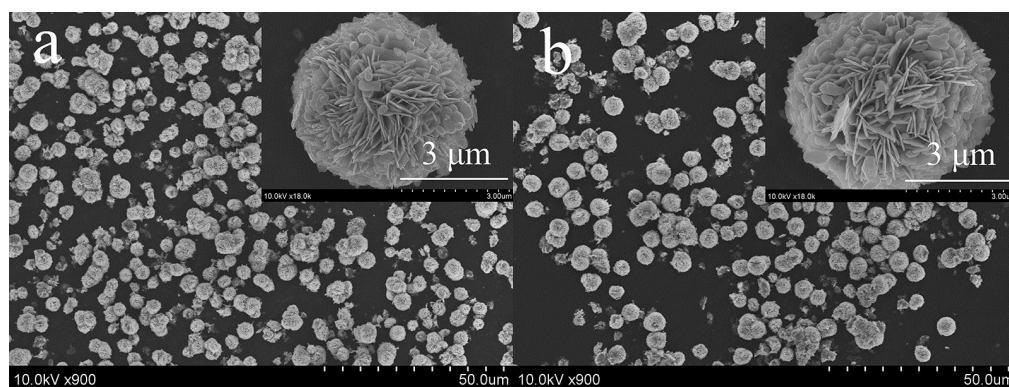

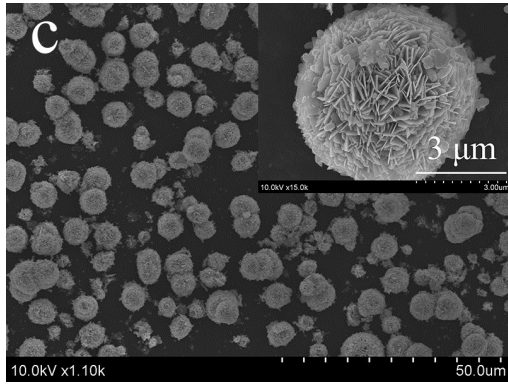

**Fig. S2** SEM images of 2%P-BiOI, 6%P-BiOI and 8%P-BiOI.

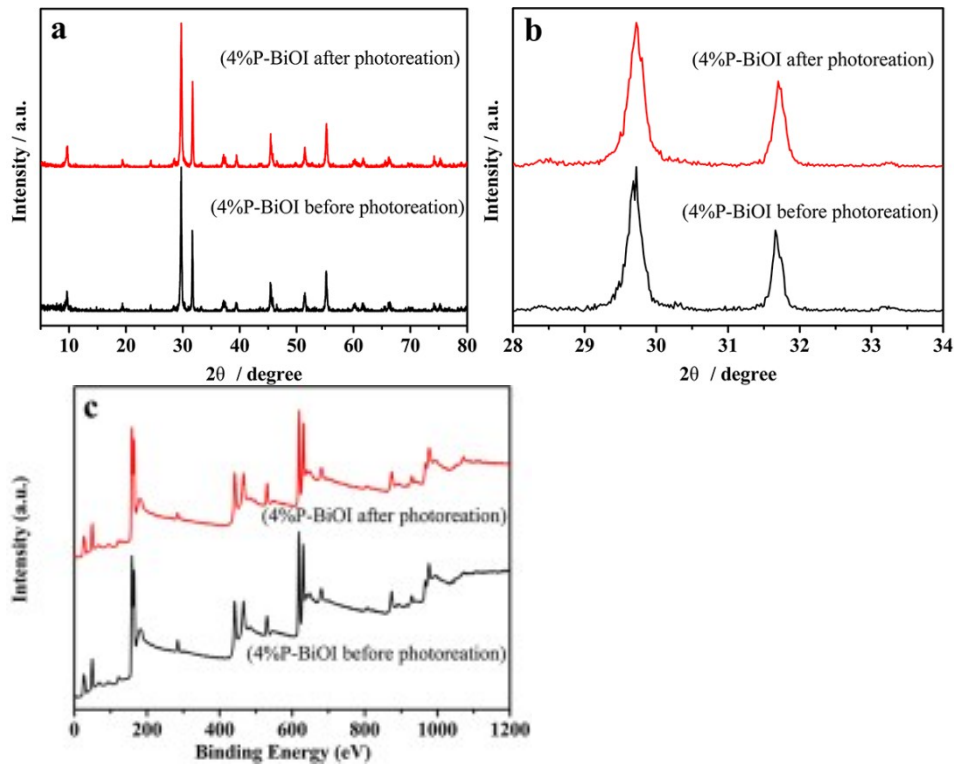

**Fig. S3** (a and b) XRD of 4%P-BiOI before and after photoreaction; (c) XPS of 4%P-BiOI before and after photoreaction.
